# Supplementary material for: Fitness Conferred by BCR-ABL Kinase Domain Mutations Determines the Risk of Pre-Existing Resistance in Chronic Myeloid Leukemia
Source: PubMed Central journal article supplement (PMC3225363; doi:10.1371/journal.pone.0027682), 2011-11-28
Supplement: pone.0027682.s004.pdf [file pone.0027682.s004.pdf]

**TABLE S1: ROBUSTNESS PROPERTIES**

|            | Probability (unperturbed rates) | Max observed | Min observed |
|------------|---------------------------------|--------------|--------------|
| I (M1)     | 0.9053                          | 0.9061       | 0.9046       |
| D (M1)     | 0.9287                          | 0.9294       | 0.9281       |
| I+D (M1)   | 0.9636                          | 0.9640       | 0.9632       |
| I +D+N(M1) | 0.9874                          | 0.9876       | 0.9872       |
| I (M2)     | 0.7798                          | 0.7816       | 0.7784       |
| D (M2)     | 0.8312                          | 0.8328       | 0.8297       |
| I+D (M2)   | 0.9115                          | 0.9125       | 0.9106       |
| I +D+N(M2) | 0.9687                          | 0.9693       | 0.9682       |
